# Supplementary material for: Enhanced phosphate sequestration by Fe(iii) modified biochar derived from coconut shell
Source: PubMed Central journal article supplement — RSC Adv. 2019 Apr 3;9(18):10425–36. doi: 10.1039/c8ra10400j (PMC9062513; doi:10.1039/c8ra10400j), 2019-04-03
Supplement: RA-009-C8RA10400J-s001.pdf [file RA-009-C8RA10400J-s001.pdf]

## Supporting Information

### Enhanced phosphate sequestration by Fe(III) modified

### biochar derived from coconut shell

Zhenxing Zhong<sup>1</sup>, Guowen Yu<sup>1</sup>, Wenting Mo<sup>2</sup>, Chunjie Zhang<sup>1</sup>, Hao Huang<sup>1,3</sup>, Shengui Li<sup>2</sup>, Meng Gao<sup>4</sup>, Xiejuan Lu<sup>1\*</sup>, Beiping Zhang<sup>1</sup>, Hongping Zhu<sup>5</sup>

<sup>1</sup> *School of Environmental Science and Engineering, Huazhong University of Science and Technology, Wuhan 430074, China*

<sup>2</sup> *Department of Urban Construction, Wuchang Shouyi University, Wuhan, 430064, China*

<sup>3</sup> *Wuhan Planning and Design Company, Wuhan, 430014, China*

<sup>4</sup> *Huangshi Institute of Environmental Protection, Huangshi, 435000, China*

<sup>5</sup> *School of Civil Engineering & Mechanics, Huazhong University of Science and Technology, Wuhan 430074, China*

\*Corresponding author: luxiejuanhust@163.com (X.J Lu); Tel: +27-87792155

---

## Appendix A

Table S1 List of isotherm models and kinetic models in this study

| Kinetic models [1]                                                                                                  | Parameters               | Isotherm models [2]                                                       | Parameters             |
|---------------------------------------------------------------------------------------------------------------------|--------------------------|---------------------------------------------------------------------------|------------------------|
| First-order:<br>$\frac{dq_t}{dt} = k_1(q_e - q_t)$ $\ln(q_e - q_t) = \ln q_e - k_1 t$                               | $q_e, q_t, k_1, R^2;$    | Freundlich<br>$q_e = K_f C_e^{1/n}$                                       | $K_F, n, R^2;$         |
| Second-order:<br>$\frac{dq_t}{dt} = k_2(q_e - q_t)^2$ $\frac{t}{q_t} = \frac{I}{k_2 q_e^2} + \frac{t}{q_e}$         | $q_e, q_t, k_2, R^2;$    | Langmuir<br>$q_e = \frac{K_L q_m C_e}{1 + K_L C_e}$                       | $K_L, q_m, R^2;$       |
| Richie n-th-order:<br>$\frac{dq_t}{dt} = k_n(q_e - q_t)^n$ $q_t = q_e - ((n - 1)k_n t + q_e^{1-n})^{\frac{1}{1-n}}$ | $q_e, q_t, k_n, n, R^2;$ | Langmuir- Freundlich<br>$q_e = \frac{K_{LF} q_m C_e^n}{1 + K_{LF} C_e^n}$ | $K_{LF}, q_m, n, R^2;$ |
| Elovich:<br>$\frac{dq_t}{dt} = a \exp(-bq_t)$ $q_t = \frac{1}{b} \ln(abt + 1)$                                      | $a, b, q_t, R^2$         |                                                                           |                        |

Table S2 Kinetic parameters of phosphate sorption to CSBs based on the intra-particle diffusion model [3]

| Adsorbents | $K_{p1}$<br>(mg/g•h <sup>1/2</sup> ) | $C_1$<br>(mg/g) | $R^2$ | $K_{p2}$<br>(mg/g•h <sup>1/2</sup> ) | $C_2$<br>(mg/g) | $R^2$ |
|------------|--------------------------------------|-----------------|-------|--------------------------------------|-----------------|-------|
| CSB        | 1.023                                | 0.463           | 0.797 | 0.049                                | 1.886           | 0.895 |
| Fe-CSB     | 0.806                                | 1.212           | 0.905 | 0.323                                | 2.092           | 0.923 |

The intraparticle diffusion model:  $q_t = k_p \cdot t^{1/2} + C$ , where  $K_p$  is the intraparticle diffusion rate constant (mg/g•h<sup>1/2</sup>), and C is a constant that reflects the thickness of the boundary layer.

Table S3 Thermodynamic parameters of P adsorption for CSB and Fe-CSB

| Materials | T (K) | Parameters   |                       |                       |                        |
|-----------|-------|--------------|-----------------------|-----------------------|------------------------|
|           |       | $K_0$ (L/mg) | $\Delta G^0$ (kJ/mol) | $\Delta H^0$ (kJ/mol) | $\Delta S^0$ (J/mol/K) |
| CSB       | 298   | 0.13         | -12.06                |                       |                        |
|           | 308   | 0.15         | -12.82                | 21.58                 | 111.43                 |
|           | 318   | 0.20         | -14.01                |                       |                        |
| Fe-CSB    | 298   | 1.43         | -18.00                |                       |                        |
|           | 308   | 1.54         | -18.79                | 26.54                 | 82.11                  |
|           | 318   | 1.63         | -19.56                |                       |                        |

Thermodynamic parameters are determined by the following equations [4]:

$$K_0 = \frac{q_e}{C_e} \quad (1); \quad \Delta G = -RT \ln K_0 \quad (2); \quad \Delta G = \Delta H - T\Delta S^0 \quad (3); \quad \ln K_0 = \frac{\Delta H^0}{RT} - \frac{\Delta S^0}{R} \quad (4);$$

where  $K_0$  is the adsorption coefficient, R is gas constant (kJ/mol K), and T is the absolute temperature (K), respectively.

Table S4 Comparison of maximum P sorption capacities for various Fe-based materials

| Adsorbents                                              | Solution pH | Contact time (h) | Temperature (°C) | Fe (wt %)  | Equilibrium Ce (mg/g) | Max $q_m$ (mg/g) | Ref.      |
|---------------------------------------------------------|-------------|------------------|------------------|------------|-----------------------|------------------|-----------|
| Fe-CSB                                                  | 7.0         | 24               | 25               | 11.2%      | 2-100                 | 36.0             | This work |
| Fe(III)-Bentonite                                       | 7.0         | 96               | 25               | 2.78%      | 0.05-5.0              | 11.2             | [5]       |
| Granulated ferric hydroxide                             | 5.5         | 24               | 20               | 31.4%      | 0.3-4.0               | 23.3             | [6]       |
| Magnetic water hyacinth biochar                         | 7.0         | 24               | 25               | 15.0-27.1% | 0.2-150               | 5.1              | [7]       |
| Fe-impregnated woodchip biochar                         | 5.6         | 24               | 24               | 2-4%       | 10-200                | 3.2              | [8]       |
| Fe-doped activated carbon                               | 7.0         | 24               | RT <sup>a</sup>  | 18.6%      | 15-640                | 8.1              | [9]       |
| Fe <sup>3+</sup> /Fe <sup>2+</sup> modified WAS biochar | 7.0         | 2                | 22               | 24.2%      | 5-1000                | 34.2             | [10]      |
| Magnetic Fe-Zr binary oxide                             | 4.0         | 24               | 25               | 26.62%     | 0-100                 | 13.7             | [11]      |
| Ferrihydrite                                            | 7.0         | 24               | 25               | 31.4%      | 0-250                 | 22.2             | [12]      |

a: RT, room temperature;

Table S5 Chemical reactions between phosphate and metal ions in this study

| Solid formed                   | Chemical equation                                                                                              | Solubility equation constant (log K) | Ref. |
|--------------------------------|----------------------------------------------------------------------------------------------------------------|--------------------------------------|------|
| Ferric phosphate               | $\text{Fe}^{3+} + \text{PO}_3^- \leftrightarrow \text{FePO}_4(\text{s})$                                       | 21.9                                 | [13] |
| Iron (III) hydrogen phosphate  | $2\text{Fe}^{3+} + 3\text{HPO}_2^- \leftrightarrow \text{Fe}_2(\text{HPO}_4)_3(\text{s})$                      | 30.9                                 | [14] |
| Iron (II) dihydrogen phosphate | $\text{Fe}^{3+} + 3\text{H}_2\text{PO}_4^- \leftrightarrow \text{Fe}(\text{H}_2\text{PO}_4)_3(\text{s})$       | 26.6                                 | [14] |
| Aluminum phosphate             | $\text{Al}^{3+} + \text{PO}_3^- \leftrightarrow \text{AlPO}_4(\text{s})$                                       | 21.0                                 | [13] |
| Aluminum hydrogen phosphate    | $2\text{Al}^{3+} + 3\text{HPO}_2^- \leftrightarrow \text{Al}_2(\text{HPO}_4)_3(\text{s})$                      | Particles                            | [15] |
| Calcium hydrogen phosphate     | $\text{Ca}^{2+} + \text{HPO}_2^- \leftrightarrow \text{CaHPO}_4(\text{s})$                                     | 6.66                                 | [16] |
| Calcium dihydrogen phosphate   | $\text{Ca}^{2+} + 2\text{H}_2\text{PO}_4^- \leftrightarrow \text{Ca}(\text{H}_2\text{PO}_4)_2(\text{s})$       | 1.14                                 | [16] |
| Tricalcium phosphate           | $3\text{Ca}^{2+} + 2\text{PO}_3^- \leftrightarrow \text{Ca}_3(\text{PO}_4)_2(\text{s})$                        | 24.0                                 | [16] |
| Hydroxyapatite                 | $5\text{Ca}^{2+} + 3\text{PO}_3^- + \text{OH}^- \leftrightarrow \text{Ca}_5(\text{PO}_4)_3\text{OH}(\text{s})$ | 55.9                                 | [16] |
| Magnesium phosphate            | $3\text{Mg}^{2+} + 2\text{PO}_3^- \leftrightarrow \text{Mg}_3(\text{PO}_4)_2(\text{s})$                        | 25.2                                 | [1]  |
| Magnesium hydrogen phosphate   | $\text{Mg}^{2+} + \text{HPO}_2^- \leftrightarrow \text{MgHPO}_4(\text{s})$                                     | 5.82                                 | [1]  |
| Magnesium dihydrogen phosphate | $\text{Mg}^{2+} + 2\text{H}_2\text{PO}_4^- \leftrightarrow \text{Mg}(\text{H}_2\text{PO}_4)_2(\text{s})$       | Particles                            | [1]  |

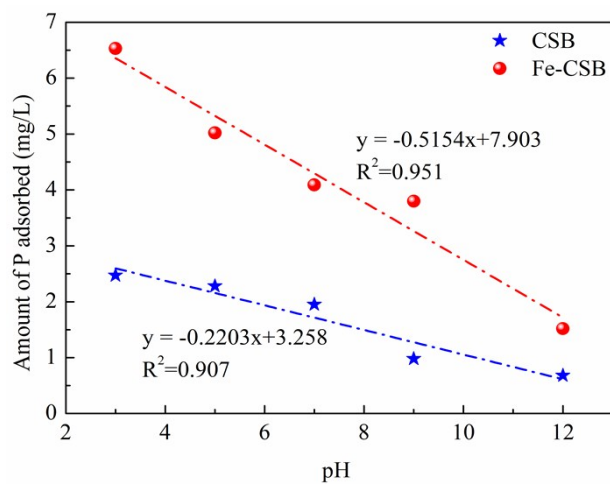

Fig. S1 Linear correlations between the initial pH and the P adsorption amount of CSB and Fe-CSB

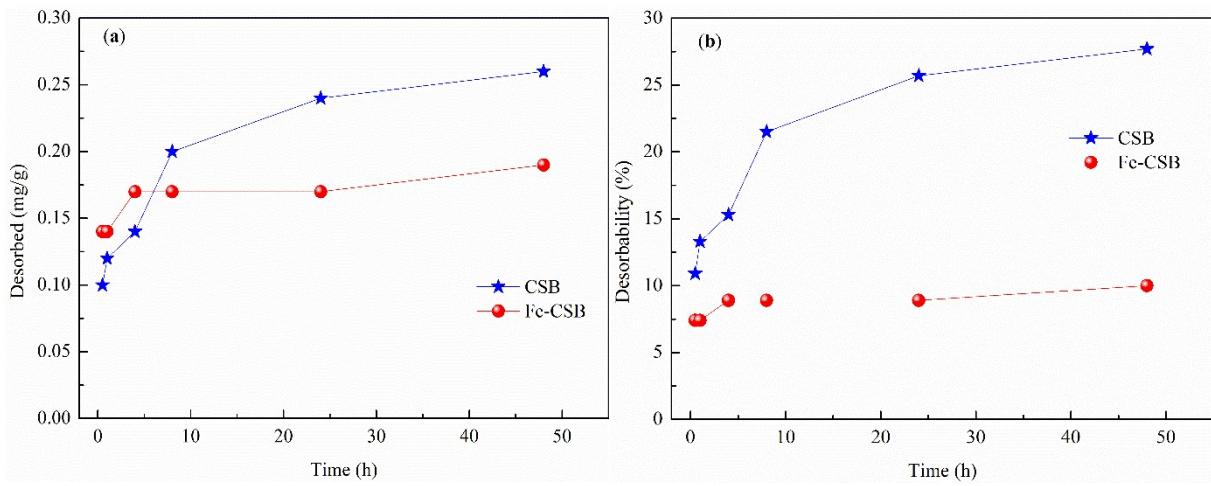

Fig. S2 Desorbed amount (a) and Desorbability (b) of the adsorbed P from the CSB and Fe-CSB



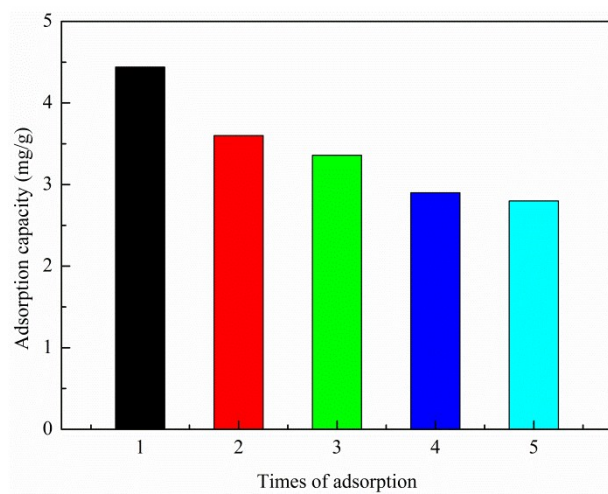

**Fig. S3.** The adsorption capacity of phosphate by Fe-CSB during five successive cycles

## References:

1. Y. Yao, B. Gao, J. Chen, L. Yang, *Environ Sci Technol*, 2013, 47, 8700-8708.
2. L. Zeng, X. Li, J. Liu, *Water Research*, 2004, 38, 1318-1326.
3. V Kuroki, G E. Bosco, P S. Fadini, *Journal of Hazardous Materials*, 2014, 274, 124–131.
4. P. Liao, S. Yuan, W. Xie, W. Zhang, M. Tong, K. Wang, *Journal of Colloid and Interface Science*, 2013, 390, 189-195.
5. M. Zamparas, A. Gianni, P. Stathi, Y. Deligiannakis, I. Zacharias, *Applied Clay Science*, 2012, 62–63, 101–106.
6. A. Genz, A. Kornmuller, M. Jekel, Advanced phosphorus removal from membrane filtrates by adsorption on activated aluminium oxide and granulated ferric hydroxide, *Water Research*, 38 (2004) 3523–3530.
7. R. Cai, X. Wang, X.H Ji, B. Peng, C.Y. Tan, X. Huang, *Journal of Environmental Management*, 2017, 187, 212-219.
8. B. Micháleková-Richveisová, V. Frišták, M. Pipiška, L. Ďuriška, E. Moreno-Jimenez, G. Soja, *Environ Sci Pollut Res*, 2017, 24, 463–475.
- 9 Y. Yao, B. Gao, M. Inyang, A. R. Zimmerman, X.D Cao, P. Pullammanappallil, L.Y. Yang, *Journal of Hazardous Materials*, 2011, 190, 501–507.
10. Q. Yang, X.L. Wang, W. Luo, J. Sun, *Bioresource Technology*, 2018, 247, 537–544.
11. F. Long, J.-L. Gong, G.-M. Zeng, L. Chen, X.-Y. Wang, J.-H. Deng, Q.-Y. Niu, H.-Y. Zhang, X.-R. Zhang, *Chemical Engineering Journal*, 2011, 171, 448-455.
12. J. Yan, T. Jiang, Y. Yao, S. Lu, Q. Wang, S. Wei, *Journal of Environmental Sciences*, 2016, 42, 152-162.
13. G W Yu, B P Zhang, X J Lu, *Arab J Geosci*, 2015, 8, 3491–3499.
14. D. Rich, [D], *Northwestern International University*, 2005.
15. H R Liu, W L Jiang, G M Su, *Modern Paint & Finishing*, 2010, 13, 10-12 (Chinese).
16. T Hiemstra, J Antelo, R Rahnemaie, *Geochimica et Cosmochimica Acta*, 2010, 74, 41–58.
